# Supplementary material
Source: Elsevier journal article supplement (https://www.sciencedirect.com/science/article/pii/S0870255117305425)
Supplement: mmc1 [file S0870255117305425:mmc1.docx]

**Supplementary Table 1** PRo-HCM: Assessment of baseline risk for sudden cardiac death.

| AHA – Five risk factor model2 | |
| --- | --- |
| Parameter |  |
| 0 | 52% |
| 1 | 33% |
| 2 | 12% |
| 3 | 3% |
| 4 | 0.2% |
| 5 | 0% |
| Syncope | 14% |
| Family history of SCD | 22% |
| NSVT | 20% |
| Massive LVH | 6% |
| Abnormal BP | 5% |
| ESC – 5-year SCD risk prediction model1 | |
| Parameter |  |
| 5-year risk <4% | 69% |
| 5-year risk 4-6% | 15% |
| 5-year risk >6% | 16% |

AHA: American Heart Association; BP: blood pressure; ESC: European Society of Cardiology; LVH: left ventricular hypertrophy; NSVT: non-sustained ventricular tachycardia; SCD: sudden cardiac death.
